# Prevalence of human papillomavirus genotypes and relative risk of cervical cancer in China: a systematic review and meta-analysis

Hui-Hui Xu<sup>1</sup>, Kai Wang<sup>2</sup>, Xing-Jun Feng<sup>2</sup>, Shan-Shan Dong<sup>3</sup>, Aifen Lin<sup>3</sup>, Ling-Zhi Zheng<sup>2</sup> and Wei-Hua Yan<sup>1</sup>

<sup>1</sup>Laboratory of Gynecologic Oncology, Medical Research Center, Taizhou Hospital of Zhejiang Province, Wenzhou Medical University, Linhai, Zhejiang, China

<sup>2</sup>Department of Gynecology and Obstetrics, Taizhou Hospital of Zhejiang Province, Wenzhou Medical University, Linhai, Zhejiang, China

<sup>3</sup>Human Tissue Bank, Taizhou Hospital of Zhejiang Province, Wenzhou Medical University, Linhai, Zhejiang, China

**Correspondence to:** Ling-Zhi Zheng, *email:* zhenglz@enzemed.com  
Wei-Hua Yan, *email:* yanwhcom@yahoo.com

**Keywords:** human papillomavirus; cervical cancer; cervical precancerous lesion; genotype; meta-analysis

**Received:** May 09, 2017 **Accepted:** December 06, 2017 **Epub:** January 11, 2018 **Published:** March 16, 2018

**Copyright:** Xu et al. This is an open-access article distributed under the terms of the Creative Commons Attribution License 3.0 (CC BY 3.0), which permits unrestricted use, distribution, and reproduction in any medium, provided the original author and source are credited.

## ABSTRACT

**High-risk HPV (hrHPV) is related to cervical carcinogenesis, although clinical data comparing the natural history and carcinogenic potential of type-specific HPV remain limited. Furthermore, the nationwide prevalence rates of overall and type-specific HPV among women with cervical precancerous lesions and cancer have not been reported. Here, a meta-analysis was performed for type-specific HPV distribution among 30,165 HPV-positive women, including 12,094 invasive cervical cancers (ICCs), 10,026 cervical intraepithelial neoplasia grade 2/3 (CIN2/3), 3246 CIN1, and 4799 normal cervixes from 45 PCR-based studies. We found that HPV16 was the most common hrHPV type involved in cervical disease. The HPV16 positivity rate varied little across normal (22.7%) and CIN1 individuals (23.6%) but increased through the CIN2 (37.6%) and CIN3 patients (51.9%) to 65.6% in ICC cases. HPV16, 18, 35, 39, 45, and 59 were more frequent in ICC than CIN3, with ICC:CIN3 ratios ranging from 2.3 for HPV18 to 1.1 for HPV35/45. HPV31, 33, 52, and 58 were more frequent in CIN3 compared with normal cervixes but less common in ICC compared with CIN3 (ICC:CIN3 ratios ranging from 0.6 for HPV58 and 0.4 for HPV52). The ICC:normal ratios were particularly high for HPV18, 52 and 58 in West China (4.1, 3.9 and 2.9, respectively) and for HPV45 and 59 in North China (1.6 and 1.1, respectively). In summary, this study is the most comprehensive analysis of type-specific HPV distribution in cervical carcinogenesis and could be valuable for HPV-based cervical cancer screening strategies and vaccination policies in China.**

## INTRODUCTION

Cervical cancer is the second most common female malignancy worldwide. In China, approximately 98,900 new cases were reported in 2015, which accounted for 18.7% of the global incidence [1]. Human papillomavirus (HPV), commonly transmitted through sexual activity, was recognized as an important cause of cervical precancerous lesions or cancer. To date, 14 HPV types have been classified as “high-risk” for their strong

carcinogenic potentials. HPV16 and HPV18 are well-known carcinogenic genotypes; additionally, HPV31, 33, 35, 39, 45, 51, 52, 56, 58, 59, 66, and 68 are also strongly associated with cervical cancer [2, 3]. In this scenario, numerous epidemiologic studies, most from Europe or the United States, have shown that nearly 100% of patients with cervical cancer test positive for HPV [3–6]. These results have led to approaches in which HPV testing is an option for primary screening with HPV16/18 genotyping along with a cocktail test of 12 other high-risk HPV

(hrHPV) genotypes [7]. HPV testing is more sensitive than cytology in primary screening and offers a longer negative predictive value for cervical cancer [5–7].

Cervical cancer incidence and mortality have been increasing and are a major public health problem in China. China has the world's largest population (approximately 1.37 billion), with approximately 70% of individuals living in rural regions where the incidence of cervical cancer is extremely high [8]. Most cervical cancer screening in China is opportunistic, and cancer incidence rates vary throughout the country [8, 9]. In addition, economic factors, education, and HPV genotype distribution, which vary among geographical regions, must also be taken into account. Moreover, comprehensive clinical data on HPV genotype prevalence and relative risk of cervical cancer in Chinese females are lacking.

In this study, we performed a systematic review and meta-analysis of type-specific HPV distribution across the complete spectrum of cervical diagnoses from normal to invasive cervical cancer (ICC). With updated data and detailed analyses, we further evaluated how influential parameters (such as geographical region, HPV DNA source, and PCR primers) affected the results from the meta-analysis.

## RESULTS

### Summary of eligible studies

We retrieved 1274 citations from the search strategy (Appendix S1), and 190 potentially relevant articles were identified for full-text review. Data were abstracted from 45 eligible studies that met the eligibility criteria [10–54]. The study flow diagram is shown in Figure 1.

### Study characteristics

Forty-five eligible studies published between 1996 and 2016, including forty-one single-center [10–50] and four multi-center studies [51–54], were documented in this review. Among these studies, 12 were conducted in East China [10–21], 3 in South China [22–24], 4 in West China [25–28], 14 in North China [29–42], 3 in Taiwan [43–45], 4 in Hong Kong [46–49], and 1 in Macao [50].

A total of 49,997 eligible women from 32 provinces and municipalities were recruited to participate in these studies (Figure 2). Out of 49,997 women tested for overall HPV prevalence, 19,361 (38.7%) had normal cervixes, 4877 (9.8%) CIN1, 11,967 (23.9%) CIN2/3, and 13,792 (27.6%) ICCs. The overall HPV distribution stratified by cervical disease grade and geographical region is shown in Table 1. Eastern China contributed the largest number of samples (20,292, 40.6%), followed by Northern China (13,390, 26.8%), Taiwan (6521, 13.0%), Hong Kong (3297, 6.6%), and Western China (2428, 4.9%). Of the 49,997 women, 1496 (3.0%) were non-

Han Chinese women including 1431 Uyghur [28] and 65 Mongolian [38].

### Overall HPV prevalence and meta-analysis

A total of 30,165 women were HPV-positive. Overall HPV prevalence increased with the degree of cervical disease severity from 24.8% in normal cervixes to 87.7% in ICC ( $P < 0.001$ ) (Table 1). The pooled prevalence of overall HPV types among women with ICC was 91.1% (95% CI 88.7–93.1%) and displayed significant heterogeneity,  $I^2 = 93.2%$ ,  $P < 0.0001$  (Figure 3). Differences in the HPV positivity rate by geographical region varied obviously among pathological categories. In normal cervixes, the overall HPV prevalence varied substantially by region, ranging from approximately 10% in Taiwan/Hong Kong to more than 20% in mainland China. For ICC, the overall HPV prevalence was consistent (more than 95%) in Taiwan, Hong Kong, and Macao but ranged from 77.5% to 92.9% and yielded an average of 83.7% (95% CI 82.9–88.2%) in mainland China. The overall HPV prevalence rates in SCC, ADC and unspecified ICC were 86.9% (5840/6721), 71.5% (459/642) and 90.1% (5795/6429), respectively.

After stratified by HPV DNA source, we found that the prevalence rates of overall HPV types in cervical cancer from tissues were consistently significantly higher than that from exfoliated cells in all geographical regions ( $P < 0.05$ ). With regard to PCR primers, HPV prevalence was higher in samples that were tested using SPF1/GP6+ (99.3%, 95% CI 99.0–99.7%) and/or SP10 (95.1%, 95% CI 93.6–96.7%) primers when compared with MY09/11 (86.1%, 95% CI 84.9–87.3%) and/or PGMY09/11 (83.6%, 95% CI 82.6–84.5%) primers ( $P < 0.001$ ). Meanwhile, the meta-analysis of the HPV prevalence in women with cervical cancer based on HPV DNA source, different region, publication calendar period, and PCR primers is shown in Table 2.

### Type-specific HPV prevalence and risk of cervical cancer

Type-specific HPV prevalence in HPV-positive women stratified by cervical disease grade is shown in Supplementary Table 3. HPV16 was the most frequently detected hrHPV type in every grade. HPV16 positivity rate varied little between cervicitis and normal tissues (22.7%, 95% CI 21.5–24.0%) and CIN1 (23.6%, 95% CI 22.0–25.3%) but increased through CIN2 (37.6%, 95% CI 35.5–39.7%) and CIN3 (51.9%, 95% CI 50.1–53.7%) to reach 65.6% (95% CI 64.7–66.4%) in ICC. HPV18 positivity varied very little between cervicitis and normal tissues and CIN3 (5.6–7.9%) but increased to 12.6% (95% CI 12.0–13.2%) in ICC. HPV58 was the second most common type in ICC (12.6%, 95% CI 12.0–13.2%). Notably, HPV52 was the second most common type in cervicitis/CIN1/

CIN2 (16.3–22.0%), but the prevalence rate decreased remarkably through CIN3 (15.7%, ranked third) and reduce to 6.5% in ICC (ranked fourth). For the next five most common hrHPV types in ICC, including HPV33, 31, 59, 45, and 39, the positivity rate ranged from 2.1% to 5.5%. For the next five least common hrHPV types in ICC, including HPV51, 56, 68, 35, and 66, the positivity rate ranged from 0.7% to 1.4%. HPV16, 18 and 45 were the only hrHPV types found more frequently in ICC than in cervicitis/normal samples, with the ICC:cervicitis/normal ratios of 2.9, 2.2 and 1.4, respectively. HPV31, 33, 52, and 58 were more frequent in CIN3 in comparison with cervicitis/normal samples, but less common in ICC compared with CIN3 (ICC:CIN3 ratios ranging from 0.6 for HPV58 and down to 0.4 for HPV52). HPV16, 18, 35, 39, 45, and 59 were more frequent in ICC than CIN3, with

ICC:CIN3 ratios ranging from 2.3 for HPV18 to 1.1 for HPV35/45.

When stratified by geographical region, we found increased HPV16 positivity with lesion severity to be similar in all regions, with ICC:cervicitis/normal ratios ranging from 2.4 in North China to 4.2 in East China (Figure 4 and Supplementary Table 1). The increased HPV18 positivity between normal and ICC cases was observed across all regions, with ICC:cervicitis/normal ratios between 1.8 and 4.1. For HPV58 and HPV52, a relatively elevated in ICC:cervicitis/normal ratio (2.9 and 3.9, respectively) was observed in West China and not apparent in other regions. With regard to HPV DNA source, we found that the prevalence of type-specific HPV in HPV-positive women with cervical cancer based on exfoliated cells were universally higher than that in

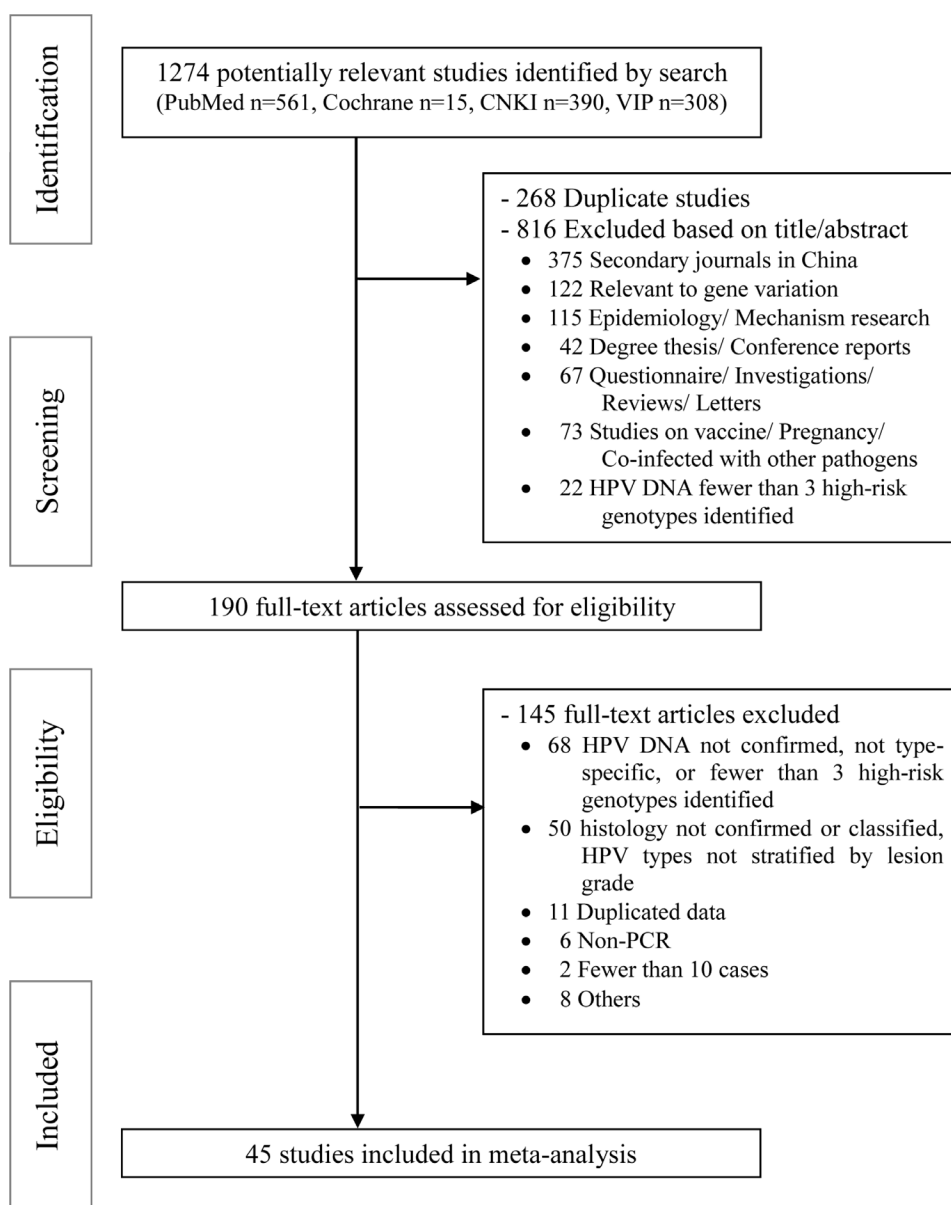

Figure 1: PRISMA flow diagram for identification of studies for meta-analysis.



**Table 1: Overall HPV prevalence in 49997 women from China, stratified by cervical disease grade and geographical region**

|                                     | Total<br>(studies = 45) |                    | ICCs<br>(studies = 39) |               | CIN2/3<br>(studies = 32) |                 | CIN1<br>(studies = 25) |               | Cervicitis/Normal<br>(studies = 21) |               |
|-------------------------------------|-------------------------|--------------------|------------------------|---------------|--------------------------|-----------------|------------------------|---------------|-------------------------------------|---------------|
|                                     | Tested,<br>N            | HPV positive,<br>n | Tested,<br>N           | HPV,<br>n (%) | Tested,<br>N             | HPV,<br>n (%)   | Tested,<br>N           | HPV,<br>n (%) | Tested,<br>N                        | HPV,<br>n (%) |
| Eastern of China<br>(studies = 12)  | 20292                   | 10758              | 5043                   | 4123 (81.8)   | 3190                     | 2683 (84.1)     | 1928                   | 1256 (65.1)   | 10131                               | 2696 (26.6)   |
| Southern of China<br>(studies = 3)  | 1614                    | 1255               | 1554                   | 1205 (77.5)   | 60                       | 50 (83.3)       | 0                      | -             | 0                                   | -             |
| Western of China<br>(studies = 4)   | 2428                    | 1462               | 334                    | 293 (87.7)    | 866                      | 759 (87.6)      | 249                    | 168 (67.5)    | 979                                 | 242 (24.7)    |
| Northern of China<br>(studies = 14) | 13390                   | 7329               | 1940                   | 1803 (92.9)   | 3826                     | 3057 (79.9)     | 1279                   | 796 (62.2)    | 6345                                | 1673 (26.4)   |
| Taiwan<br>(studies = 3)             | 6521                    | 4332               | 2475                   | 2412 (97.5)   | 1703                     | 1421 (83.4)     | 542                    | 322 (59.4)    | 1801                                | 177 (9.8)     |
| Hong Kong<br>(studies = 4)          | 3297                    | 2743               | 785                    | 747 (95.2)    | 1622                     | 1367 (84.3)     | 785                    | 618 (78.7)    | 105                                 | 11 (10.5)     |
| Macao<br>(studies = 1)              | 99                      | 94                 | 36                     | 35 (97.2)     | 63                       | 59 (93.7)       | 0                      | -             | 0                                   | -             |
| Multi-center<br>(studies = 4)       | 2356                    | 2192               | 1625                   | 1476 (90.8)   | 637                      | 630 (98.9)      | 94                     | 86 (91.5)     | 0                                   | -             |
| Overall<br>(studies = 45)           | 49997                   | 30165              | 13792                  | 12094 (87.7)  | 11967                    | 10026<br>(83.8) | 4877                   | 3246 (66.6)   | 19361                               | 4799 (24.8)   |

Abbreviations: ICC: invasive cervical cancer; CIN: cervical intraepithelial neoplasia.

1 and Supplementary Table 3), indicating an increased long-term risk for cervical cancer with HPV16 infection [58–60]. The same pattern was found for HPV18. The pooled prevalence rates of HPV16 and 18 in cervical cancer were 66.8% (95% CI 62.5–70.8%) (Supplementary Figure 1) and 11.8% (95% CI 9.8–14.1%) (Supplementary Figure 2), respectively. Our data showed that the HPV16 positivity rate was similar to the previously published global data ( $64.7 \pm 3.6\%$ ) but lower for HPV18 ( $16.5 \pm 2.9\%$ ) [58]. Compared with the rest of the world, the HPV16/18 prevalence for ICCs (78.2%) in this study was similar to that reported for Eastern Asia (77.5%), lower than Western/Central Asia (88.1%), Europe (83.1%), and North America (80.8%), and higher than Latin America (66.4%) [58, 61]. These results strengthen the hypothesis that the distribution of HPV16/18 variants is related to geographical or racial distribution [62], and HPV variants that differ in their biological properties may present differences in carcinogenic potential.

Consistent with previous epidemiological studies, HPV16, 52 and 58 were the dominant hrHPV types in the general Chinese population [63, 64]. Our analysis showed that HPV52 and 58 were the 2nd and 3rd most common hrHPV types among women with lower grade lesions. The HPV52 positivity rate decreased remarkably from normal histology (16.3%, ranked second) to ICC (6.5%, ranked fourth), but HPV58 was still the common type in ICC (12.6%, ranked second). These findings showed that HPV52 and 58 were important etiological agents for cervical carcinogenesis in China; however, HPV52 was less carcinogenic than HPV58. In addition, HPV52 and 58 were more frequent in CIN3 than in normal cervixes, but

less common in ICCs. This pattern was also observed for HPV31 and HPV33. These results suggested that HPV31, 33, 52, and 58 could confer higher risks for CIN3 than other non-HPV16/18 types, supporting the results from previous studies [58–60, 65].

Alpha-7 species containing HPV18, 39, 45, 59 and 68, which are proportionally overrepresented in ADC [66], are known to be less efficiently detected by routine cytological screening [67, 68]. In the present meta-analysis, a total of 5480 SCC and 459 ADC cases with positive HPV status were included (Supplementary Table 4). ADC constituted less than 8% of all ICCs; therefore, the type-specific HPV prevalence in ICC is mainly driven by the findings for SCC. Our results confirmed that alpha-7 HPV types are significantly higher in ADC (46.9%) than in SCC (10.1%) ( $P < 0.001$ ). Moreover, HPV18 was the most common alpha-7 type (44.4% in ADC vs. 9.1% in SCC), and similar patterns were also found for HPV39, 45, 59 and 68.

HPV35, 51, 56, 66, and 68 types found in  $< 1.5\%$  of ICC represented an important proportion of low-grade cervical lesions. The lower ICC:normal ratios suggested that such types have relatively low carcinogenic potential. Of note, the ICC:normal ratios for HPV45 and HPV58 were consistently higher, suggesting a higher carcinogenic potential compared with all other non-HPV16/18 types.

Meta-analysis on the prevalence of overall HPV types showed a higher rate detected in a subgroup of tissues than in exfoliated cells (Table 2). However, the prevalence of type-specific HPV in HPV-positive women with cervical cancer based on cells was universally higher than that on tissues (Table 3). Our findings suggested that

**Table 2: Meta-analysis of the HPV prevalence in women with ICC, stratified by HPV DNA source, across region, publication calendar period, and PCR primers**

|                                    | Total          |              |                            |                              | Cells-based detection |              |                            |                              | Tissue-based detection |              |                            |                              |
|------------------------------------|----------------|--------------|----------------------------|------------------------------|-----------------------|--------------|----------------------------|------------------------------|------------------------|--------------|----------------------------|------------------------------|
|                                    | No. of studies | No. of cases | <i>P</i> for heterogeneity | Pooled prevalence % (95% CI) | No. of studies        | No. of cases | <i>P</i> for heterogeneity | Pooled prevalence % (95% CI) | No. of studies         | No. of cases | <i>P</i> for heterogeneity | Pooled prevalence % (95% CI) |
| <b>Total</b>                       | 39             | 12094        | < 0.0001                   | 91.1 (88.7–93.1)             | 24                    | 7557         | < 0.0001                   | 89.6 (86.4–92.0)             | 15                     | 4537         | < 0.0001                   | 92.9 (87.9–95.9)             |
| <b>Region</b>                      |                |              |                            |                              |                       |              |                            |                              |                        |              |                            |                              |
| Mainland                           | 28             | 7424         | < 0.0001                   | 89.1 (86.3–91.4)             | 20                    | 6753         | < 0.0001                   | 89.1 (85.7–91.7)             | 8                      | 671          | 0.0008                     | 89.2 (83.9–92.9)             |
| Taiwan                             | 3              | 2412         | < 0.0001                   | 94.7 (70.6–99.3)             | 1                     | 227          | NA                         | NA                           | 2                      | 2185         | < 0.0001                   | 96.8 (57.6–99.9)             |
| Hong Kong                          | 4              | 747          | 0.0081                     | 92.9 (83.9–97.1)             | 2                     | 425          | 0.0652                     | 90.1 (68.3–97.5)             | 2                      | 322          | 0.0059                     | 98.1 (50.5–99.9)             |
| Macao                              | 1              | 35           | NA                         | NA                           | 0                     | 0            | NA                         | NA                           | 1                      | 35           | NA                         | NA                           |
| Multi-center                       | 3              | 1476         | < 0.0001                   | 95.9 (81.8–99.2)             | 1                     | 152          | NA                         | NA                           | 2                      | 1324         | < 0.0001                   | 96.8 (57.6–99.9)             |
| <b>Publication calendar period</b> |                |              |                            |                              |                       |              |                            |                              |                        |              |                            |                              |
| 1996–1999                          | 3              | 123          | 0.7527                     | 85.9 (79.1–90.7)             | 1                     | 7            | NA                         | NA                           | 2                      | 116          | 0.8364                     | 86.6 (79.7–91.4)             |
| 2000–2009                          | 13             | 2857         | < 0.0001                   | 91.6 (88.2–94.1)             | 5                     | 918          | 0.0035                     | 92.0 (87.1–95.2)             | 8                      | 1939         | < 0.0001                   | 91.2 (85.8–94.7)             |
| 2010–2016                          | 23             | 9114         | < 0.0001                   | 91.4 (87.8–94.0)             | 18                    | 6632         | < 0.0001                   | 88.7 (84.9–91.7)             | 5                      | 2482         | < 0.0001                   | 97.3 (81.3–99.7)             |
| <b>PCR primers</b>                 |                |              |                            |                              |                       |              |                            |                              |                        |              |                            |                              |
| MY09/11                            | 15             | 2741         | < 0.0001                   | 90.3 (84.2–94.2)             | 9                     | 2167         | < 0.0001                   | 91.2 (79.9–96.4)             | 6                      | 574          | 0.0627                     | 89.0 (84.7–92.2)             |
| PGMY09/11                          | 14             | 5221         | < 0.0001                   | 88.7 (84.6–91.8)             | 12                    | 4899         | < 0.0001                   | 87.8 (83.4–91.1)             | 2                      | 322          | 0.0059                     | 98.1 (50.5–99.9)             |
| SP10                               | 3              | 725          | < 0.0001                   | 93.2 (66.4–98.9)             | 0                     | 0            | NA                         | NA                           | 3                      | 725          | < 0.0001                   | 93.2 (66.4–98.9)             |
| SPF1/GP6+                          | 1              | 2104         | NA                         | NA                           | 0                     | 0            | NA                         | NA                           | 1                      | 2104         | NA                         | NA                           |
| MY09/11+GP5+/6+                    | 6              | 1303         | 0.0003                     | 90.4 (84.8–94.1)             | 3                     | 491          | 0.0092                     | 91.8 (80.6–96.8)             | 3                      | 812          | 0.0167                     | 90.3 (80.5–95.5)             |

95% CI: 95% confidence interval; NA: not available.

the HPV prevalence in cells did not correspond well to that observed in tissues. It should be noted that the complex link between historical infections and current disease status might be related to HPV genome integration status [69]. In addition, HPV type-specific primers are usually designed to amplify shorter sequences of HPV DNA and might be more sensitive for detection of HPV DNA sequences. Indeed, our study showed that the HPV detection rate of ICC in Taiwan was much higher using SPF1/GP6+ (99.3%, 95% CI 99.0–99.7%) to amplify an 184-bp fragment when compared with other PCR primer sets.

It is necessary to consider the limitations of our meta-analysis while interpreting the results. First, potential heterogeneity associated with the cross-sectional study design and its inherent risk of bias, including the variations in population characteristics, PCR-based HPV detection protocols, quality of diagnosis and cervical screening strategies among the studies, must be considered. Second, heterogeneity could not be ruled out even given the pre-designed subgroup analysis by geographical region, PCR primer sets and publication calendar period. To address this issue, we chose the random effect model meta-analysis to combine data. Third, 77.4% of the patients included in the meta-analysis came from only two macro-geographical regions of mainland China (40.6% in the East and 26.8% in the North, respectively). Thus, one should be cautious when extrapolating our summary results to all regions of China. Fourth, several studies did not include for a broad range for type-specific HPV [15, 38–40, 46, 51, 53].

Our present meta-analysis suggested a significantly increased risk of cervical cancer associated with high-

risk HPV genotype infection. HPV16, 18 and 58 were the most frequently observed genotypes in cervical cancer specimens and showed a strong association with the development of cancer. However, the association between type-specific HPV distribution and cervical cancer risk was slightly influenced by factors such as geographical regions, HPV DNA sources, and PCR primers. It should be noted that the laboratory standardization and quality assurance of HPV genotyping methods may increase data comparability and improve virological surveillance in the future vaccine era of China.

## MATERIALS AND METHODS

### Consent statement

As this study was a systematic review and meta-analysis, we did not include any humans and/or animals. This study was approved by the Institutional Medical Ethics Review Board of Taizhou Hospital in Zhejiang Province.

### Search strategy

This meta-analysis was performed in adherence with the guidelines outlined in the Preferred Reporting Items for Systematic Reviews and Meta-Analyses (PRISMA) [70] (Supplementary Table 5, PRISMA Checklist). We used PubMed/MEDLINE (NCBI), the Cochrane Central Register of Controlled Trials (Wiley), China National Knowledge Infrastructure (CNKI), and the VIP database for Chinese

Technical Periodicals (VIP) to search for relevant articles published from the earliest date available to November 15, 2016. The search strategy is described in Appendix S1. Furthermore, we reviewed the references cited in the retrieved articles to search for additional relevant studies.

### Eligibility criteria

The participants were females from China who were included in studies of cervical disease associated with

HPV. Eligible studies met the following inclusion criteria: 1) using consensus PCR primers, 2) overall and type-specific HPV elicitation, and 3) confirmed by cervical pathological diagnosis. The exclusion criteria were as follows: 1) duplicated data, 2) reviews, letters, conference reports or degree thesis, 3) studies on HIV patients or other sexually transmitted pathogens, 4) studies on gestational or vaccinated women, 5) HPV genotypes not stratified by lesion grade or fewer than 10 cases, and 6) HPV DNA types fewer than 3 high-risk genotypes identified.

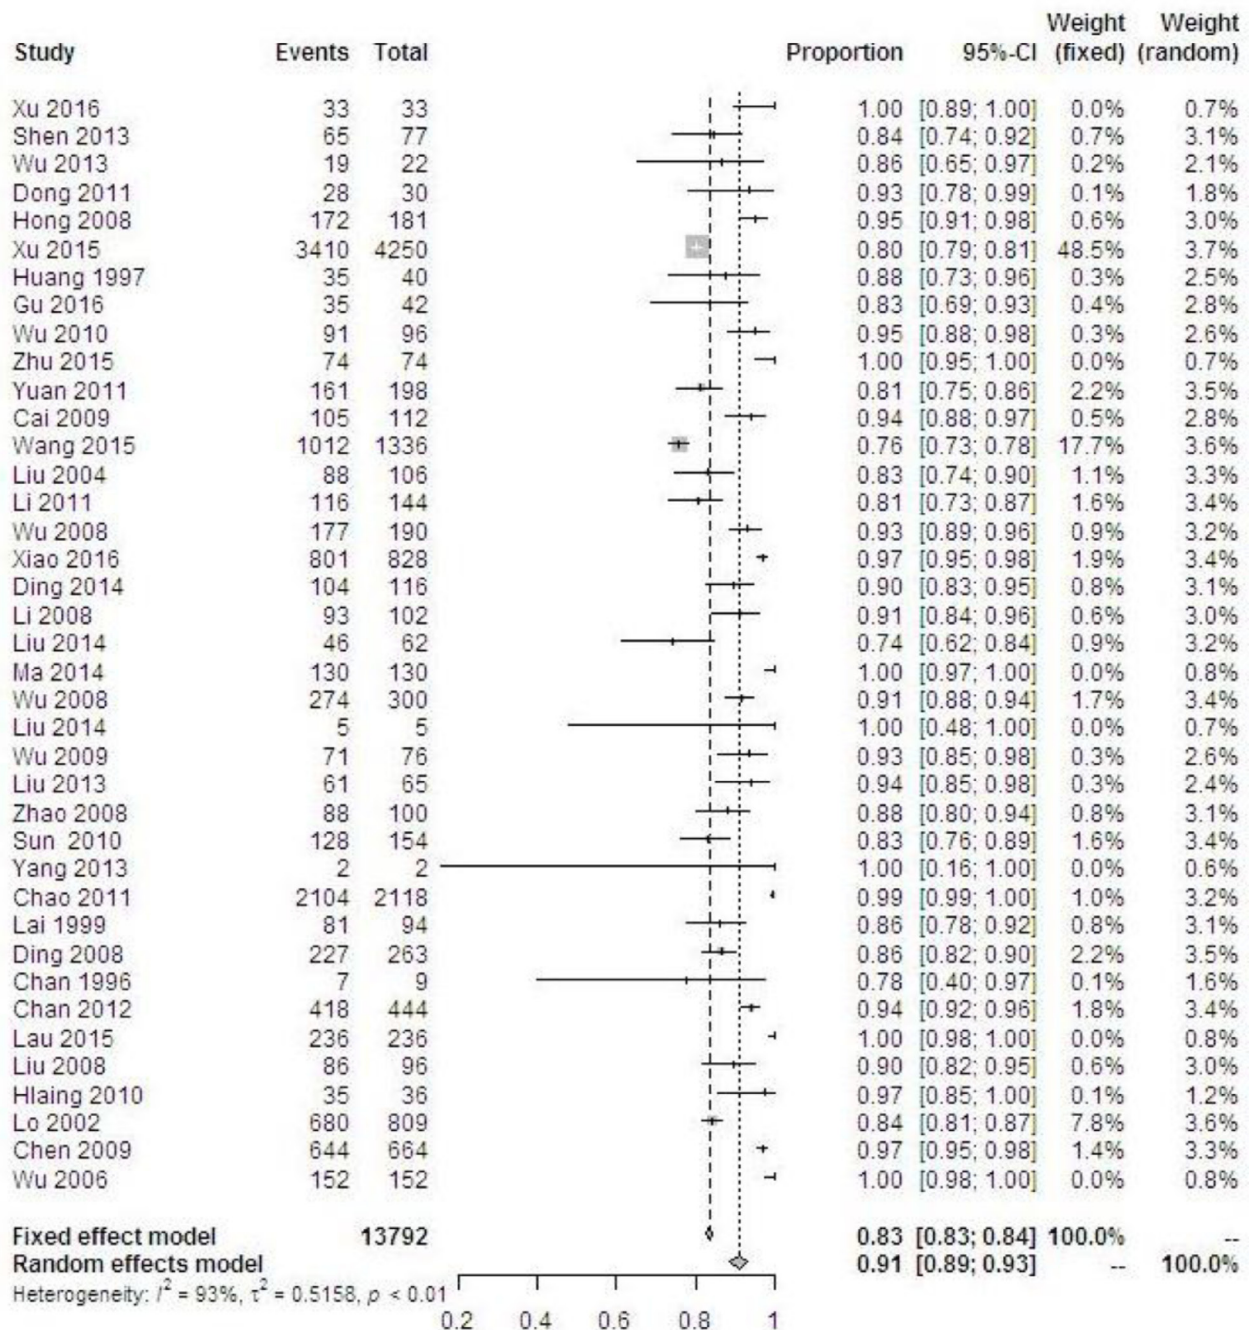

Figure 3: Forest plot of the overall HPV prevalence in cervical cancer.

**Table 3: Type-specific HPV prevalence in HPV-positive women with cervical cancer, stratified by HPV DNA source**

|                          | Total    |          |                  | Cells-based detection |          |                  | Tissue-based detection |          |                  |
|--------------------------|----------|----------|------------------|-----------------------|----------|------------------|------------------------|----------|------------------|
|                          | <i>N</i> | <i>n</i> | % (95% CI)       | <i>N</i>              | <i>n</i> | % (95% CI)       | <i>N</i>               | <i>n</i> | % (95% CI)       |
| <b>Type-specific HPV</b> |          |          |                  |                       |          |                  |                        |          |                  |
| HPV16                    | 12020    | 7882     | 65.6 (64.7–66.4) | 7483                  | 5021     | 67.1 (66.0–68.2) | 4537                   | 2861     | 63.1 (61.7–64.5) |
| HPV18                    | 12020    | 1516     | 12.6 (12.0–13.2) | 7483                  | 841      | 11.2 (10.5–12.0) | 4537                   | 675      | 14.9 (13.8–15.9) |
| HPV58                    | 11984    | 1507     | 12.6 (12.0–13.2) | 7476                  | 1005     | 13.4 (12.7–14.2) | 4508                   | 502      | 11.1 (10.2–12.1) |
| HPV52                    | 11744    | 759      | 6.5 (6.0–6.9)    | 7324                  | 488      | 6.7 (6.1–7.2)    | 4420                   | 271      | 6.1 (5.4–6.8)    |
| HPV33                    | 11099    | 608      | 5.5 (5.1–5.9)    | 7483                  | 376      | 5.0 (4.5–5.5)    | 3616                   | 232      | 6.4 (5.6–7.2)    |
| HPV31                    | 11181    | 393      | 3.5 (3.2–3.9)    | 7476                  | 291      | 3.9 (3.5–4.3)    | 3705                   | 102      | 2.8 (2.2–3.3)    |
| HPV59                    | 7178     | 186      | 2.6 (2.2–3.0)    | 3640                  | 115      | 3.2 (2.6–3.7)    | 3538                   | 71       | 2.0 (1.5–2.5)    |
| HPV45                    | 5659     | 118      | 2.1 (1.7–2.5)    | 2902                  | 35       | 1.2 (0.8–1.6)    | 2757                   | 83       | 3.0 (2.4–3.6)    |
| HPV39                    | 7337     | 162      | 2.2 (1.9–2.5)    | 4066                  | 83       | 2.0 (1.6–2.5)    | 3271                   | 79       | 2.4 (1.9–2.9)    |
| HPV51                    | 4931     | 69       | 1.4 (1.1–1.7)    | 2336                  | 41       | 1.8 (1.2–2.3)    | 2595                   | 28       | 1.1 (0.7–1.5)    |
| HPV56                    | 5648     | 74       | 1.3 (1.0–1.6)    | 3141                  | 51       | 1.6 (1.2–2.1)    | 2507                   | 23       | 0.9 (0.5–1.3)    |
| HPV68                    | 3582     | 48       | 1.3 (1.0–1.7)    | 3035                  | 42       | 1.4 (1.0–1.8)    | 547                    | 6        | 1.1 (0.2–2.0)    |
| HPV35                    | 5131     | 60       | 1.2 (0.9–1.5)    | 2456                  | 32       | 1.3 (0.9–1.8)    | 2675                   | 28       | 1.0 (0.7–1.4)    |
| HPV66                    | 2338     | 16       | 0.7 (0.4–1.0)    | 1874                  | 16       | 0.9 (0.4–1.3)    | 464                    | 0        | NA               |

95% CI: 95% confidence interval; NA: not available.

### Data extraction

Two investigators (SS. Dong and XJ. Feng) independently extracted data from eligible studies. Disagreements were resolved by discussion or involvement of a third investigator (HH. Xu). For each eligible study, the following items were extracted: first author, publication year, region of China, study design, HPV DNA source, PCR primers, pathological diagnosis, sample size, and the number of overall or type-specific HPV-positive samples. For a subset of studies reporting such data, the overall

prevalence of multiple infections (which may also include low-risk HPV types) was also extracted. Detail information on all included studies is presented in Supplementary Table 4. Each study was classified according to the following criteria: 1) four macro-geographical regions of mainland China (East, West, South, and North, respectively), Taiwan, Hong Kong, and Macao, 2) HPV DNA source (exfoliated cells, fresh biopsies, fixed biopsies), and 3) histological diagnosis (CIN1, CIN2, CIN3, ICC, squamous cell carcinoma (SCC), or adeno/adenosquamous carcinoma (ADC)).

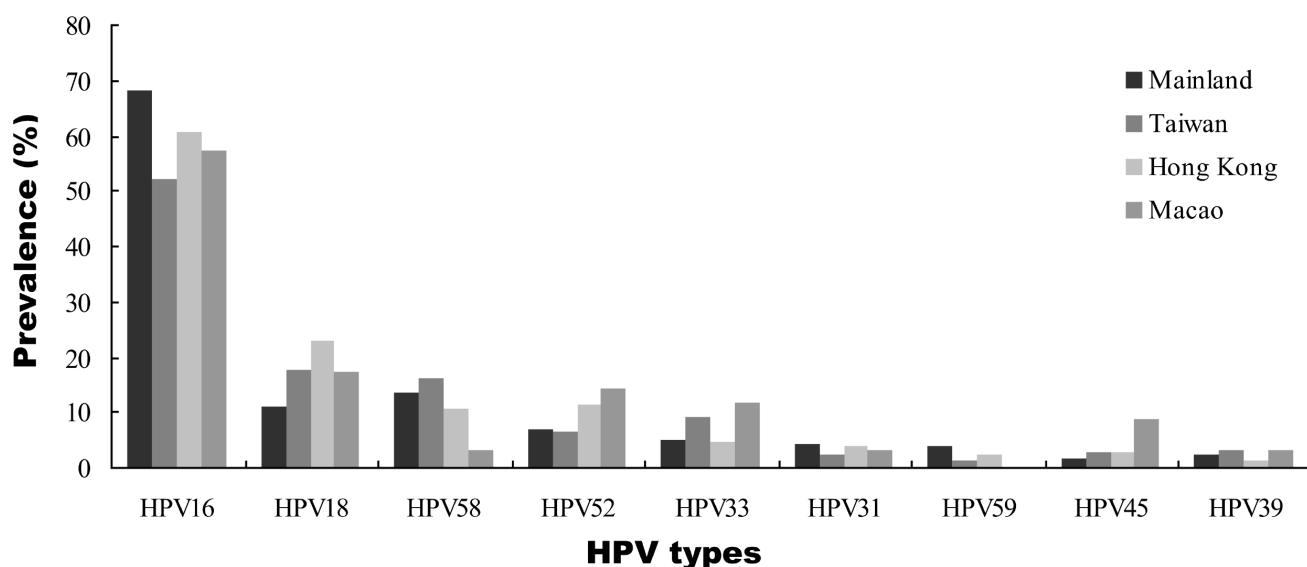

**Figure 4: Type-specific HPV distribution by geographic region in Chinese women with ICC.**



## Quality assessment

Two investigators (LZ. Zheng and A. Lin) independently assessed the quality/risk of bias for each eligible study according to the quality assessment forms from the AHRQ (<https://www.ncbi.nlm.nih.gov/books/NBK35156/>) [71]. A third investigator (K. Wang) resolved the disagreements. In this meta-analysis, the methodological quality of all eligible studies was assessed by AHRQ and included an 11-item yes/no/unclear response option: the “Yes” was scored as “1”, and “No” or “Unclear” was scored “0”. Study quality was assessed as follows: high quality = 8–11; moderate quality = 4–7; low quality = 0–3.

## Statistical analysis

We calculated the prevalence of the overall HPV and type-specific HPV (14 high-risk HPV types: HPV 16, 18, 31, 33, 35, 39, 45, 51, 52, 56, 58, 59, 66 and 68; 2 low-risk HPV types: HPV 6 and 11) among Chinese women with cervical precancerous lesions and ICCs. Type-specific HPV prevalence was defined as the proportion of HPV-positive women in which a particular HPV type was detected, so sample sizes differed among the type-specific analyses. Odds ratios (ORs) and relative 95% confidence intervals (95% CI) were calculated using SPSS version 15.0 (SPSS Inc., Chicago, IL). *P* values were two-sided, and statistical significance was accepted if the *P* value was 0.05 or less.

Meta-analysis was conducted using a random effects model. The  $I^2$  statistic quantified the heterogeneity among the studies, and  $P < 0.10$  was considered indicative of significant heterogeneity. Forest plots were used to display the results graphically. To examine the potential publication bias, we used the Egger’s and Begg’s tests, where  $P < 0.05$  was considered to be statistically significant. All analyses were performed using the R statistical software, and the Metaprop command was used as it provides appropriate methods for dealing with proportions with 100% [72].

## Author contributions

WHY and HHX designed the study. HHX, SSD and XJF screened the studies and extracted data. LZZ, AL and KW analyzed the data and provided statistical guidance. WHY and HHX drafted the manuscript. All authors read and approved the final manuscript.

## ACKNOWLEDGMENTS AND FUNDING

This work was supported by grants from the Science and Technology Bureau of Zhejiang Province (2016C33231), the National Natural Science Foundation of China (31370920, 81372247), and the Zhejiang

Provincial program for the cultivation of high-level innovative health talents.

## CONFLICTS OF INTEREST

The authors declare that they have no competing interests.

## REFERENCES

1. Chen W, Zheng R, Baade PD, Zhang S, Zeng H, Bray F, Jemal A, Yu XQ, He J. Cancer statistics in China, 2015. *CA Cancer J Clin.* 2016; 66:115–32.
2. Crosbie EJ, Einstein MH, Franceschi S, Kitchener HC. Human papillomavirus and cervical cancer. *Lancet.* 2013; 382:889–99.
3. Muñoz N, Bosch FX, de Sanjosé S, Herrero R, Castellsagué X, Shah KV, Snijders PJ, Meijer CJ; International Agency for Research on Cancer Multicenter Cervical Cancer Study Group. Epidemiologic classification of human papillomavirus types associated with cervical cancer. *N Engl J Med.* 2003; 348:518–27.
4. Coglianò V, Baan R, Straif K, Grosse Y, Secretan B, El Ghissassi F; WHO International Agency for Research on Cancer. Carcinogenicity of human papillomaviruses. *Lancet Oncol.* 2005; 6:204.
5. Ronco G, Dillner J, Elfström KM, Tunesi S, Snijders PJ, Arbyn M, Kitchener H, Segnan N, Gilham C, Giorgi-Rossi P, Berkhof J, Peto J, Meijer CJ; International HPV screening working group. Efficacy of HPV-based screening for prevention of invasive cervical cancer: follow-up of four European randomized controlled trials. *Lancet.* 2014; 383:524–32.
6. C Kitchener H, Canfell K, Gilham C, Sargent A, Roberts C, Desai M, Peto J. The clinical effectiveness and cost-effectiveness of primary human papillomavirus cervical screening in England: extended follow-up of the ARTISTIC randomised trial cohort through three screening rounds. *Health Technol Assess.* 2014; 18:1–196.
7. Huh WK, Ault KA, Chelmow D, Davey DD, Goulart RA, Garcia FA, Kinney WK, Massad LS, Mayeaux EJ, Saslow D, Schiffman M, Wentzensen N, Lawson HW, et al. Use of primary high-risk human papillomavirus testing for cervical cancer screening: interim clinical guidance. *Gynecol Oncol.* 2015; 136:178–82.
8. Zhao FH, Lin MJ, Chen F, Hu SY, Zhang R, Belinson JL, Sellors JW, Franceschi S, Qiao YL, Castle PE; Cervical Cancer Screening Group in China. Performance of high-risk human papillomavirus DNA testing as a primary screen for cervical cancer: a pooled analysis of individual patient data from 17 population-based studies from China. *Lancet Oncol.* 2010; 11:1160–71.
9. Pan QJ, Hu SY, Guo HQ, Zhang WH, Zhang X, Chen W, Cao J, Jiang Y, Zhao FH, Qiao YL. Liquid-based cytology and human papillomavirus testing:

- a pooled analysis using the data from 13 population-based cervical cancer screening studies from China. *Gynecol Oncol*. 2014; 133:172–9.
10. Xu H, Lin A, Shao X, Shi W, Zhang Y, Yan W. Diagnostic accuracy of high-risk HPV genotyping in women with high-grade cervical lesions: evidence for improving the cervical cancer screening strategy in China. *Oncotarget*. 2016; 7:83775–83. <http://doi.org/10.18632/oncotarget.11959>.
  11. Shen XH, Liu SH. Human papillomavirus genotypes associated with mucopurulent cervicitis and cervical cancer in Hangzhou, China. *Asian Pac J Cancer Prev*. 2013; 14:3603–6.
  12. Wu LL, Huang L, Wu XZ. Clinical significance of distribution of human papilloma virus in high grade cervical intraepithelial neoplasia and cervical cancer. *Chin J Nosocomiol*. 2013; 23:2125–32.
  13. Dong CL, Chen GJ, Lu JH, Chen MC, Xu F. Role of human papilloma virus genotyping in prevention of cervical cancer. *Chin J Nosocomiol*. 2011; 21:4858–60.
  14. Hong D, Ye F, Chen H, Lü W, Cheng Q, Hu Y, Xie X. Distribution of human papillomavirus genotypes in the patients with cervical carcinoma and its precursors in Zhejiang Province, China. *Int J Gynecol Cancer*. 2008; 18:104–9.
  15. Xu XX, Zhou JS, Yuan SH, Yu H, Lou HM. Distribution of HPV Genotype in Invasive Cervical Carcinoma and Cervical Intraepithelial Neoplasia in Zhejiang Province, Southeast China: Establishing the Baseline for Surveillance. *Int J Environ Res Public Health*. 2015; 12:10794–805.
  16. Huang S, Afonina I, Miller BA, Beckmann AM. Human papillomavirus types 52 and 58 are prevalent in cervical cancers from Chinese women. *Int J Cancer*. 1997; 70:408–11.
  17. Gu Y, Ma C, Zou J, Zhu Y, Yang R, Xu Y, Zhang Y. Prevalence characteristics of high-risk human papillomaviruses in women living in Shanghai with cervical precancerous lesions and cancer. *Oncotarget*. 2016; 7:24656–63. <http://doi.org/10.18632/oncotarget.8262>.
  18. Wu D, Cai L, Huang M, Zheng Y, Yu J. Prevalence of genital human papillomavirus infection and genotypes among women from Fujian province, PR China. *Eur J Obstet Gynecol Reprod Biol*. 2010; 151:86–90.
  19. Zhao FH, Zhu FC, Chen W, Li J, Hu YM, Hong Y, Zhang YJ, Pan QJ, Zhu JH, Zhang X, Chen Y, Tang H, Zhang H, et al. Baseline prevalence and type distribution of human papillomavirus in healthy Chinese women aged 18–25 years enrolled in a clinical trial. *Int J Cancer*. 2014; 135:2604–11.
  20. Zhu X, Liu H, Wu H, Liu W, Yin L, Sun X. Carcinogenic ability quantification of human papilloma virus subtypes in eastern China. *J Med Virol*. 2015; 87:2106–13.
  21. Yuan X, Yang Y, Gu D, Liu H, Yang H, Wang M. Prevalence of human papillomavirus infection among women with and without normal cervical histology in Shandong Province, China. *Arch Gynecol Obstet*. 2011; 283:1385–89.
  22. Cai HB, Ding XH, Chen CC. Prevalence of single and multiple human papillomavirus types in cervical cancer and precursor lesions in Hubei, China. *Oncology*. 2009; 76:157–61.
  23. Wang L, Wu B, Li J, Chen L. Prevalence of human papillomavirus and its genotype among 1336 invasive cervical cancer patients in Hunan province, central south China. *J Med Virol*. 2015; 87:516–21.
  24. Liu J, Rose B, Huang X, Liao G, Carter J, Wu X, Thompson C. Comparative analysis of characteristics of women with cervical cancer in high- versus low-incidence regions. *Gynecol Oncol*. 2004; 94:803–10.
  25. Li J, Mei J, Wang X, Hu L, Lin Y, Yang P. Human papillomavirus type-specific prevalence in women with cervical intraepithelial neoplasm in Western China. *J Clin Microbiol*. 2012; 50:1079–81.
  26. Li J, Zhang D, Zhang Y, Wang X, Lin Y, Hu L. Prevalence and genotype distribution of human papillomavirus in women with cervical cancer or high-grade precancerous lesions in Chengdu, western China. *Int J Gynaecol Obstet*. 2011; 112:131–4.
  27. Wu EQ, Zhang GN, Yu XH, Ren Y, Fan Y, Wu YG, Kong W, Zha X. Evaluation of high-risk human papillomaviruses type distribution in cervical cancer in Sichuan province of China. *BMC Cancer*. 2008; 8:202.
  28. Du R, Chen ZF, Li XH, Ding Y, Zhang Y. Human papillomavirus infection among Uyghur women with cervical intraepithelial neoplasia in Xinjiang area. *Eur J Gynaecol Oncol*. 2015; 36:564–8.
  29. Xiao M, Xu Q, Li H, Gao H, Bie Y, Zhang Z. Prevalence of Human Papillomavirus Genotypes Among Women With High-Grade Cervical Lesions in Beijing, China. *Medicine*. 2016; 95(3):e2555.
  30. Ding X, Liu Z, Su J, Yan D, Sun W, Zeng Z. Human papillomavirus type-specific prevalence in women referred for colposcopic examination in Beijing. *J Med Virol*. 2014; 86:1937–43.
  31. Hou R, Xu C, Zhang S, Wu M, Zhang W. Distribution of human papillomavirus genotype and cervical neoplasia among women with abnormal cytology in Beijing, China. *Int J Gynaecol Obstet*. 2012; 119:257–61.
  32. Li C, Wu M, Wang J, Zhang S, Zhu L, Pan J, Zhang W. A population-based study on the risks of cervical lesion and human papillomavirus infection among women in Beijing, People's Republic of China. *Cancer Epidemiol Biomarkers Prev*. 2010; 19:2655–64.
  33. Li Y, Wang Y, Jia C, Ma Y, Lan Y, Wang S. Detection of human papillomavirus genotypes with liquid bead microarray in cervical lesions of northern Chinese patients. *Cancer Genet Cytogenet*. 2008; 182:12–7.
  34. Liu X, Li Q, Chen W, Li L, Shen G, Zhang X. p16 and PR immunoreactivity and human papillomavirus infection in endocervical adenocarcinoma. *Zhonghua zhong liu za zhi*. 2014; 36:263–7. [Article in Chinese].

35. Ma Q, Hou M, Yang XF. Screening of the genital human papillomavirus infection among 8581 women in the First Affiliated Hospital of Xi'an Jiaotong University. *Zhongguo Yi Xue Ke Xue Yuan Xue Bao*. 2014; 36:277–82.
36. Wu Y, Zhang Q, Liu B, Yu G. The analysis of the entire HLA, partial non-HLA and HPV for Chinese women with cervical cancer. *J Med Virol*. 2008; 80:1808–13.
37. Liu G, Yu L, Song H, Mi R, Chen Y. Clinical value of human papillomavirus genotyping testing in the diagnosis of cervical intraepithelial neoplasia. *Zhonghua fu chan ke za zhi*. 2014; 49:446–50. [Article in Chinese].
38. Wu EQ, Yu XH, Zha X, Zhang GN, Wang JH, Fan Y, Tang YY, Zhao ZX, Wu YG, Kong W. Distribution of human papillomavirus genotypes in archival cervical lesions in eastern inner Mongolian autonomous region, China. *Int J Gynecol Cancer*. 2009; 19:919–23.
39. Liu W, Wu EQ, Yu XH, Feng LH, Jiang CL, Zha X, Kong W. Detection of human papillomavirus genotypes associated with mucopurulent cervicitis and cervical cancer in Changchun, China. *Int J Gynaecol Obstet*. 2013; 120:124–6.
40. Zhao Y, Lin H, Shen D, Xuan Y, Lin Z. Distribution of HPV genotypes in uterine cervical lesions in Yanbian, northern China. *Pathol Int*. 2008; 58:643–7.
41. Sun ZR, Ji YH, Zhou WQ, Zhang SL, Jiang WG, Ruan Q. Characteristics of HPV prevalence among women in Liaoning province, China. *Int J Gynaecol Obstet*. 2010; 109:105–9.
42. Yang L, Li N, Guo LW, Li Q, Cui H, Dai M. Prevalence of human papilloma virus and analysis of its risk factors in Daqing city, Heilongjiang province in 2010. *Zhonghua yu fang yi xue za zhi*. 2013; 47:118–23. [Article in Chinese].
43. Chao A, Jao MS, Huang CC, Huang HJ, Cheng HH, Yang JE, Hsueh S, Chen TC, Qiu JT, Lin CT, Fu CJ, Chou HH, Lai CH. Human papillomavirus genotype in cervical intraepithelial neoplasia grades 2 and 3 of Taiwanese women. *Int J Cancer*. 2011; 128:653–9.
44. Lai HC, Sun CA, Yu MH, Chen HJ, Liu HS, Chu TY. Favorable clinical outcome of cervical cancers infected with human papilloma virus type 58 and related types. *Int J Cancer*. 1999; 84:553–7.
45. Ding DC, Hsu HC, Huang RL, Lai HC, Lin CY, Yu MH, Chu TY. Type-specific distribution of HPV along the full spectrum of cervical carcinogenesis in Taiwan: an indication of viral oncogenic potential. *Eur J Obstet Gynecol Reprod Biol*. 2008; 140:245–51.
46. Chan MK, Lau KM, Tsui Y, Wong FW, Huang DP. Human papillomavirus infection in Hong Kong Chinese women with normal and abnormal cervix-detection by polymerase chain reaction method on cervical scrapes. *Gynecol Oncol*. 1996; 60:217–23.
47. Chan PK, Cheung TH, Li WH, Yu MY, Chan MY, Yim SF, Ho WC, Yeung AC, Ho KM, Ng HK. Attribution of human papillomavirus types to cervical intraepithelial neoplasia and invasive cancers in Southern China. *Int J Cancer*. 2012; 131:692–705.
48. Lau YM, Cheung TH, Yeo W, Mo F, Yu MY, Lee KM, Ho WC, Yeung AC, Law PT, Chan PK. Prognostic implication of human papillomavirus types and species in cervical cancer patients undergoing primary treatment. *PLoS one*. 2015; 10:e0122557.
49. Liu SS, Tsang PC, Chan KY, Cheung AN, Chan KK, Leung RC, Ngan HY. Distribution of six oncogenic types of human papillomavirus and type 16 integration analysis in Chinese women with cervical precancerous lesions and carcinomas. *Tumour Bio*. 2008; 29:105–13.
50. Hlaing T, Yip YC, Ngai KL, Vong HT, Wong SI, Ho WC, Batalha SL, Chan PK. Distribution of human papillomavirus genotypes among cervical intraepithelial neoplasia and invasive cancers in Macao. *J Med Virol*. 2010; 82:1600–5.
51. Lo KW, Wong YF, Chan MK, Li JC, Poon JS, Wang VW, Zhu SN, Zhang TM, He ZG, Wu QL, Li GD, Tam JS, Kahn T, et al. Prevalence of human papillomavirus in cervical cancer: a multicenter study in China. *Int J Cancer*. 2002; 100:327–31.
52. Zhang R, Velicer C, Chen W, Liaw KL, Wu EQ, Liu B, Cui JF, Belinson JL, Zhang X, Shen GH, Chen F, Qiao YL. Human papillomavirus genotype distribution in cervical intraepithelial neoplasia grades 1 or worse among 4215 Chinese women in a population-based study. *Cancer Epidemiol*. 2013; 37:939–45.
53. Chen W, Zhang X, Molijn A, Jenkins D, Shi JF, Quint W, Schmidt JE, Wang P, Liu YL, Li LK, Shi H, Liu JH, Xie X, et al. Human papillomavirus type-distribution in cervical cancer in China: the importance of HPV 16 and 18. *Cancer Causes Control*. 2009; 20:1705–13.
54. Wu Y, Chen Y, Li L, Yu G, Zhang Y, He Y. Associations of high-risk HPV types and viral load with cervical cancer in China. *J Clin Virol*. 2006; 35:264–9.
55. Bao YP, Li N, Wang H, Qiao YL. Study on the distribution of human papillomavirus types in cervix among Chinese women: a meta-analysis. *Zhonghua Liu Xing Bing Xue Za Zhi*. 2007; 28:941–6. [Article in Chinese].
56. Bao YP, Li N, Smith JS, Qiao YL. Human papillomavirus type-distribution in the cervix of Chinese women: a meta-analysis. *Int J STD AIDS*. 2008; 19:106–11.
57. Katki HA, Kinney WK, Fetterman B, Lorey T, Poitras NE, Cheung L, Demuth F, Schiffman M, Wacholder S, Castle PE. Cervical cancer risk for women undergoing concurrent testing for human papillomavirus and cervical cytology: a population-based study in routine clinical practice. *Lancet Oncol*. 2011; 12:663–72.
58. Guan P, Howell-Jones R, Li N, Bruni L, de Sanjosé S, Franceschi S, Clifford GM. Human papillomavirus types in 115,789 HPV-positive women: a meta-analysis from cervical infection to cancer. *Int J Cancer*. 2012; 131:2349–59.

59. Schiffman M, Glass AG, Wentzensen N, Rush BB, Castle PE, Scott DR, Buckland J, Sherman ME, Rydzak G, Kirk P, Lorincz AT, Wacholder S, Burk RD. A long-term prospective study of type-specific human papillomavirus infection and risk of cervical neoplasia among 20,000 women in the Portland Kaiser Cohort Study. *Cancer Epidemiol Biomarkers Prev.* 2011; 20:1398–409.
60. Chen HC, Schiffman M, Lin CY, Pan MH, You SL, Chuang LC, Hsieh CY, Liaw KL, Hsing AW, Chen CJ; CBCSP-HPV Study Group. Persistence of type-specific human papillomavirus infection and increased long-term risk of cervical cancer. *J Natl Cancer Inst.* 2011; 103:1387–96.
61. Ciapponi A, Bardach A, Glujovsky D, Gibbons L, Picconi MA. Type-specific HPV prevalence in cervical cancer and high-grade lesions in Latin America and the Caribbean: systematic review and meta-analysis. *PLoS One.* 2011; 6:e25493.
62. Chen AA, Gheit T, Franceschi S, Tommasino M, Clifford GM; IARC HPV Variant Study Group. Human Papillomavirus 18 Genetic Variation and Cervical Cancer Risk Worldwide. *J Virol.* 2015; 89:10680–7.
63. Wang R, Guo XL, Wisman GB, Schuurin E, Wang WF, Zeng ZY, Zhu H, Wu SW. Nationwide prevalence of human papillomavirus infection and viral genotype distribution in 37 cities in China. *BMC Infect Dis.* 2015; 15:257.
64. Li J, Huang R, Schmidt JE, Qiao YL. Epidemiological features of Human Papillomavirus (HPV) infection among women living in Mainland China. *Asian Pac J Cancer Prev.* 2013; 14:4015–23.
65. Matsumoto K, Oki A, Furuta R, Maeda H, Yasugi T, Takatsuka N, Mitsuhashi A, Fujii T, Hirai Y, Iwasaka T, Yaegashi N, Watanabe Y, Nagai Y, et al. Predicting the progression of cervical precursor lesions by human papillomavirus genotyping: A prospective cohort study. *Int J Cancer.* 2011; 128:2898–910.
66. Clifford G, Franceschi S. Members of the human papillomavirus type 18 family (alpha-7 species) share a common association with adenocarcinoma of the cervix. *Int J Cancer.* 2008; 122:1684–5.
67. Ronco G, Giorgi-Rossi P, Carozzi F, Confortini M, Dalla Palma P, Del Mistro A, Ghiringhello B, Girlando S, Gillio-Tos A, De Marco L, Naldoni C, Pierotti P, Rizzolo R, et al. Efficacy of human papillomavirus testing for the detection of invasive cervical cancers and cervical intraepithelial neoplasia: a randomised controlled trial. *Lancet Oncol.* 2010; 11:249–57.
68. Ault KA, Joura EA, Kjaer SK, Iversen OE, Wheeler CM, Perez G, Brown DR, Koutsky LA, Garland SM, Olsson SE, Tang GW, Ferris DG, Paavonen J, et al. Adenocarcinoma *in situ* and associated human papillomavirus type distribution observed in two clinical trials of a quadrivalent human papillomavirus vaccine. *Int J Cancer.* 2011; 128:1344–53.
69. Liu Y, Zhang C, Gao W, Wang L, Pan Y, Gao Y, Lu Z, Ke Y. Genome-wide profiling of the human papillomavirus DNA integration in cervical intraepithelial neoplasia and normal cervical epithelium by HPV capture technology. *Sci Rep.* 2016; 6:35427.
70. Moher D, Liberati A, Tetzlaff J, Altman DG; PRISMA Group. Preferred reporting items for systematic reviews and meta-analyses: the PRISMA statement. *PLoS Med.* 2009; 6:e1000097.
71. Wells G, Shea B, O'Connell D, Peterson J, Welch V, Losos M, Tugwell P. The Newcastle-Ottawa Scale (NOS) for assessing the quality of nonrandomised studies in meta-analyses. Ottawa Hospital Research Institute. 2011. [http://www.ohri.ca/programs/clinical\\_epidemiology/oxford.asp](http://www.ohri.ca/programs/clinical_epidemiology/oxford.asp).
72. Nyaga VN, Arbyn M, Aerts M. Metaprop: a Stata command to perform meta-analysis of binomial data. *Arch Public Health.* 2014; 72:39.
